# Supplementary material for: Expanded Hemodialysis as Effective Alternative to On-Line Hemodiafiltration: A Randomized Mid-Term Clinical Trial
Source: Research Square preprint supplement (doi:10.21203/rs.3.rs-227695/v1), 2021-02-24
Supplement: Supplementary file 1 [file c8ee46a56779b49046e59afd.docx]

**Supplementary material** to **Expanded hemodialysis as effective alternative to on-line hemodiafiltration: a randomized mid-term clinical trial**

Authors: Fernando Hadad-Arrascue, Lars-Göran Nilsson, Angela S. Rivera, Angelito A. Bernardo, Juan B. Cabezuelo Romero

Table S1. Analytical assays used to measure biomarker plasma concentrations

| **Biomarker** | **Assay used** |
| --- | --- |
| B2microglobulin | Beta2-microglobulin Universal Kit (DiAgam, Spain) |
| FLCs | N Latex CLL Kappa and N Latex CLL Lambda (Siemens Healthcare Diagnostics Products GmbH, Germany) |
| YKL-40 | MicroVue Bone YKL-40 EIA (Quidel, CA, USA) |
| FGF-23 | Human FGF-23 (Intact) ELISA Kit (Immutopics, CA, USA) |
| IL-6 | Immulite 2000 (Siemens Healthcare Diagnostics Products GmbH, Germany) |
| CRP | Vitros hsCRP (Ortho Clinical Diagnostics, UK) |
| PTX3 | Quantikine ELISA Human Pentraxin 3/TSG-14 Immunoassay (R&D Systems Inc., MN, USA) |

Figure S1:  CONSORT patient flow diagram

**
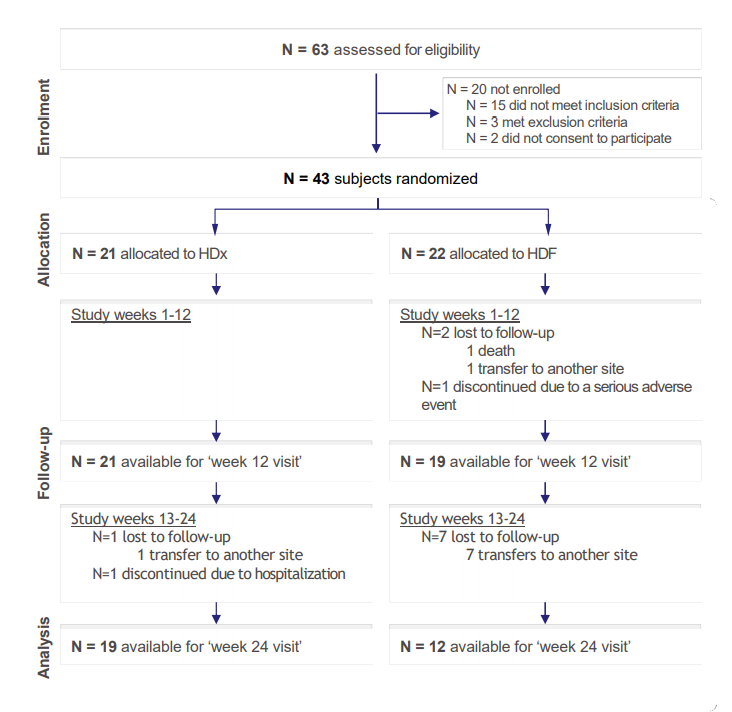
**
